# Supplementary material for: Pharmacological Inhibition of IKK to Tackle Latency and Hyperinflammation in Chronic HIV-1 Infection
Source: MDPI journal article supplement (doi:10.3390/ijms232315000), 2022-11-30
Supplement: s1 [file s1]

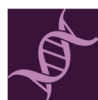

## Supplementary materials

Table S1. Summary of IKK inhibitors included in the study.

| Compound                  | Source      | Cat. No. | Target               | IC50                                       | Ref. |
|---------------------------|-------------|----------|----------------------|--------------------------------------------|------|
| MRT67307                  | Invivogen   | inh-mrt  | TBK-1/IKK $\epsilon$ | 19 nM (TBK1);<br>160 nM (IKK $\epsilon$ )  | [1]  |
| BX-795                    | Invivogen   | tlrl-bx7 | TBK-1/IKK $\epsilon$ | 6 nM (TBK1);<br>41 nM (IKK $\epsilon$ )    | [2]  |
| TBK1/IKK $\epsilon$ -IN-1 | Selleckchem | S8922    | TBK-1/IKK $\epsilon$ | 1.0 nM (TBK1);<br>5.6 nM (IKK $\epsilon$ ) | [3]  |
| TBK1/IKK $\epsilon$ -IN-2 | Selleckchem | S0425    | TBK-1/IKK $\epsilon$ | -                                          | [4]  |
| GSK8612                   | Selleckchem | S8872    | TBK-1                | 158 nM                                     | [5]  |
| TPCA-1                    | Selleckchem | S2824    | IKK $\beta$          | 17.9 nM                                    |      |
| SC514                     | Selleckchem | S4907    | IKK $\beta$          | 3–12 $\mu$ M                               | [6]  |

Table S2. Immunological and virological characteristics of study participants at the time of cell sample collection.

| ID | Age | Sex | Ethnicity | Estimated min.<br>length of HIV<br>infection<br>(years) | Estimated min.<br>length of viral<br>suppression<br>(years) | CD4 Nadir<br>(cells/ $\mu$ L) | CD4 count<br>(cells/ $\mu$ L) | Viral Load<br>(copies/mL) | ART<br>Regimen*         |
|----|-----|-----|-----------|---------------------------------------------------------|-------------------------------------------------------------|-------------------------------|-------------------------------|---------------------------|-------------------------|
| 1  | 38  | M   | Caucasian | 4                                                       | 4                                                           | 460                           | 932                           | <40                       | DRV/COBI                |
| 2  | 39  | M   | Caucasian | 8                                                       | 4.9                                                         | 603                           | 902                           | <40                       | DTG/ABC/3TC<br>/DOVATO  |
| 3  | 36  | F   | Caucasian | 7                                                       | 6.4                                                         | 504                           | 1396                          | <40                       | ABC/3TC,<br>DOVATO, RAL |

\* ABC, abacavir; COBI, cobicistat; DRV, darunavir; DTG, dolutegravir; RAL, raltegravir; 3TC, lamivudine.

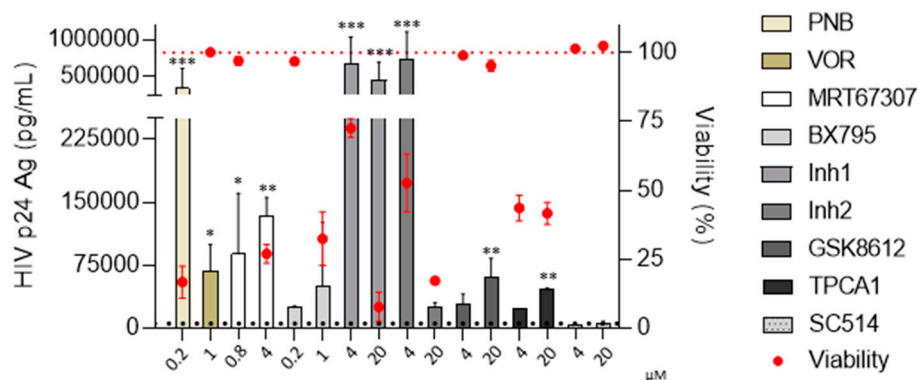

**Figure S1. IKK Inhibitors induce HIV reactivation in *in vitro* lymphoid ACH-2 model of latency.** HIV reactivation is determined by the expression of HIV-1 p24 antigen in cell culture supernatants as measured by ELISA in ACH-2 cultured for 48 h in the presence of subtoxic concentrations of IKKis. HDCAi panobinostat (PNB) and vorinostat (VOR) were used as controls for HIV-1 reactivation. Basal reactivation (grey-dashed line) in ACH-2 was established according to the non-drug condition (ND). Red dashed line represents toxicity in untreated condition. Mean  $\pm$  SD of three independent experiments is shown. \* $p < 0.05$ ; \*\* $p < 0.01$ , \*\*\* $p < 0.001$ .

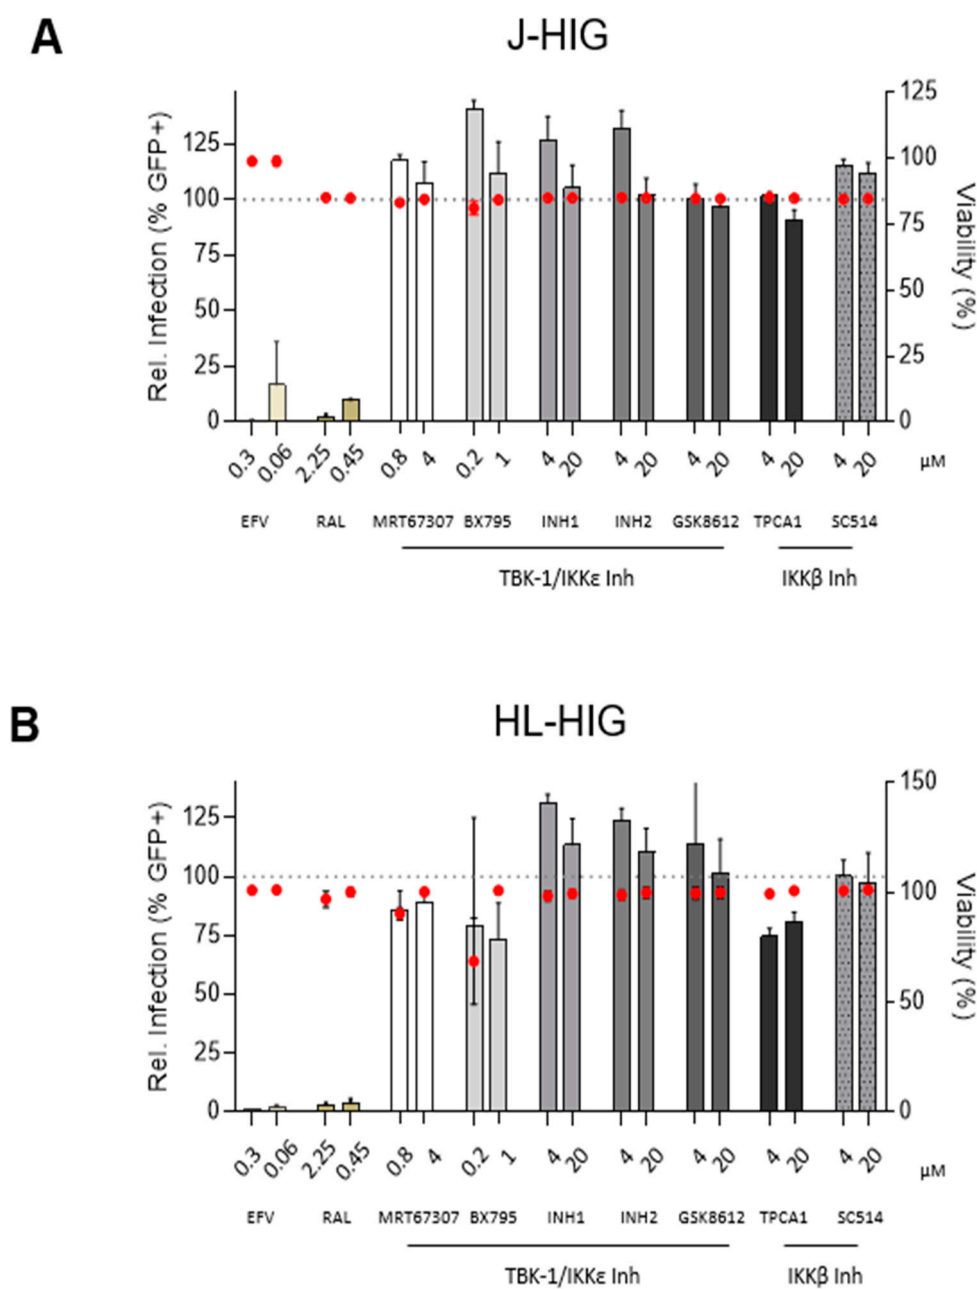

**Figure S2. Antiviral activity of IKK inhibitors in acute HIV-1 infection cell models.** IKKis do not exert anti-HIV activity on *in vitro* acute infection in lymphoid Jurkat (A) and myeloid HL-60 cells (B) as measured by the generation of GFP+ cells 72h after infection with VSV-HIG. Anti-HIV compounds efavirenz (EFV) and raltegravir (RAL) were used as controls. Grey-dashed line indicates infection level in ND control. Red dots indicate relative cell viability. Mean  $\pm$  SD of three independent experiments is shown.

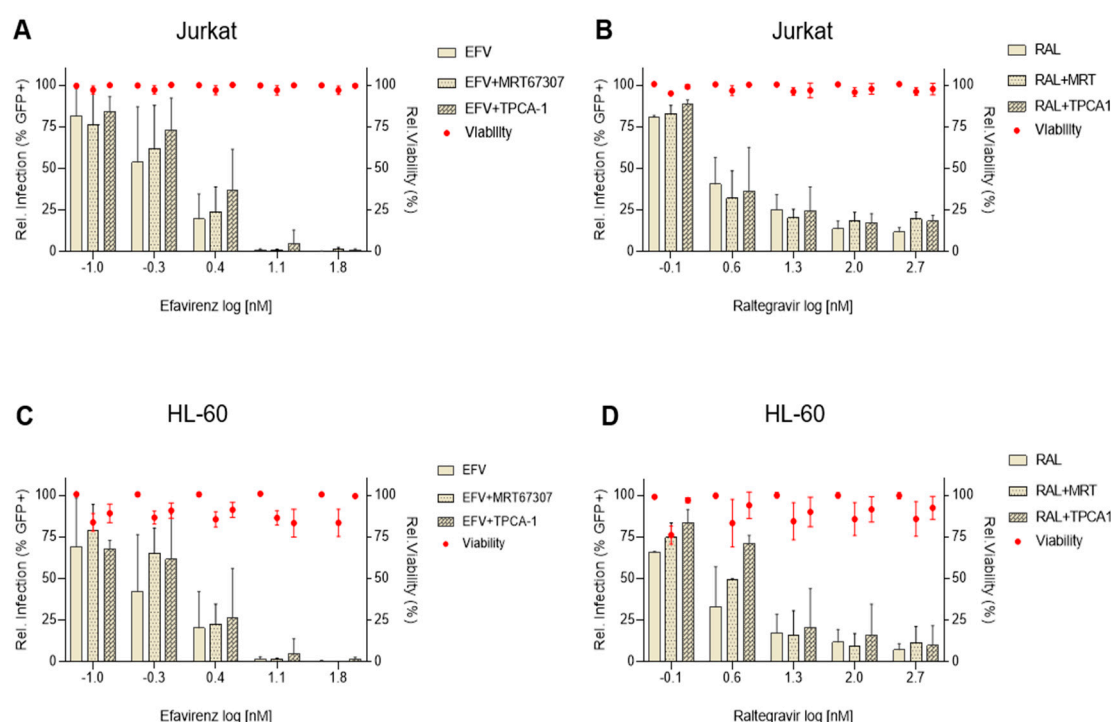

**Figure S3. Antiviral activity of antiviral drugs in combination with IKK inhibitors.** Anti-HIV activity of EFV (A) and RAL (B) in Jurkat cells coincubated with 4  $\mu$ M of MRT67307 or TPCA-1 and infected with pseudotyped HIV-1 (VSV-HIG). Infection was measured as the percentage of GFP+ cells 48h after infection. Anti-HIV activity of EFV (C) and RAL (D) in HL-60 cells incubated with 4  $\mu$ M of MRT67307 or TPCA-1. Red dots indicate cell toxicity of each IKKi alone. Mean  $\pm$  SD of three independent experiments is shown.

## References

- Clark, K.; Pegg, M.; Plater, L.; Sorcek, R.J.; Young, E.R.R.; Madwed, J.B.; Hough, J.; McIver, E.G.; Cohen, P. Novel cross-talk within the IKK family controls innate immunity. *Biochem. J.* **2011**, *434*, 93–104. <https://doi.org/10.1042/BJ20101701>.
- Clark, K.; Plater, L.; Pegg, M.; Cohen, P. Use of the Pharmacological Inhibitor BX795 to Study the Regulation and Physiological Roles of TBK1 and I $\kappa$ B Kinase Epsilon: A Distinct Upstream Kinase Mediates Ser-172 Phosphorylation and Activation. *J. Biol. Chem.* **2009**, *284*, 14136–14146. <https://doi.org/10.1074/JBC.M109.000414>.
- Jenkins, R.W.; Aref, A.R.; Lizotte, P.H.; Ivanova, E.; Stinson, S.; Zhou, C.W.; Bowden, M.; Deng, J.; Liu, H.; Miao, D.; et al. Ex Vivo Profiling of PD-1 Blockade Using Organotypic Tumor Spheroids. *Cancer Discov.* **2018**, *8*, 196–215. <https://doi.org/10.1158/2159-8290.CD-17-0833>.
- Muvaffak, A.; Pan, Q.; Yan, H.; Fernandez, R.; Lim, J.; Dolinski, B.; Nguyen, T.T.; Strack, P.; Wu, S.; Chung, R.; et al. Evaluating TBK1 as a Therapeutic Target in Cancers with Activated IRF3. *Mol. Cancer Res.* **2014**, *12*, 1055–1066. <https://doi.org/10.1158/1541-7786.MCR-13-34-0642>.
- Thomson, D.W.; Poeckel, D.; Zinn, N.; Rau, C.; Strohmmer, K.; Wagner, A.J.; Graves, A.P.; Perrin, J.; Bantscheff, M.; Duempelfeld, B.; et al. Discovery of GSK8612, a Highly Selective and Potent TBK1 Inhibitor. *ACS Med. Chem. Lett.* **2019**, *10*, 780–785. <https://doi.org/10.1021/ACSMEDCHEMLETT.9B00027>.
- Kishore, N.; Sommers, C.; Mathialagan, S.; Guzova, J.; Yao, M.; Hauser, S.; Huynh, K.; Bonar, S.; Mielke, C.; Albee, L.; et al. A Selective IKK-2 Inhibitor Blocks NF- $\kappa$  B-Dependent Gene Expression in Interleukin-1 Beta-Stimulated Synovial Fibroblasts. *J. Biol. Chem.* **2003**, *278*, 32861–32871. <https://doi.org/10.1074/JBC.M211439200>.
